# Supplementary material for: Repeated measures of mammographic density and texture to evaluate prediction and risk of breast cancer: a systematic review of the methods used in the literature
Source: PubMed Central journal article supplement (PMC10533570; doi:10.1007/s10552-023-01739-2), 2023-06-20
Supplement: 10552_2023_1739_MOESM1_ESM.pdf [file 10552_2023_1739_MOESM1_ESM.pdf]

Article title: Repeated measures of mammographic density and texture to evaluate prediction of breast cancer risk: a systematic review of the methods used in the literature

Journal name: Cancer Causes & Control

Author names: Akila Anandarajah, Yongzhen Chen, Carolyn Stoll, Angela Hardi, Shu Jiang, Graham A. Colditz

Affiliation and e-mail address of the corresponding author: Division of Public Health Sciences, Department of Surgery, Washington University School of Medicine, 660 S Euclid Ave MSC 8100-0094-2200, Saint Louis, MO 63110; colditzg@wustl.edu

### **Complete Search Strategies:**

#### **Search strategies designed and executed by Angela Hardi, MLIS**

##### **Embase.com**

=3,919 results on 9/9/2020 (Limited to English; editorials, letters, and notes excluded from results)

**Updated search** (date limited to 2020-present): 602 on 10/14/2021

('breast density'/exp OR ((breast NEAR/3 densit\*):ti,ab,kw OR (mammary NEAR/3 densit\*):ti,ab,kw OR (mammographic NEAR/3 densit\*):ti,ab,kw)) AND ('mammography'/de OR mammograph\*:ti,ab,kw OR mammogram\*:ti,ab,kw OR mastrography:ti,ab,kw OR 'digital breast tomosynthesis':ti,ab,kw OR 'x-ray breast tomosynthesis':ti,ab,kw) NOT ('editorial'/it OR 'letter'/it OR 'note'/it) AND [english]/lim

##### **Ovid Medline All**

= 2694 results on 9/9/2020 (Limited to English; editorials, comments, and letters excluded)

**Updated search** (date limited to 2020-present): 440 results on 10/14/2021

(Breast Density/ OR (breast adj3 densit\*).ti,ab. OR (mammary adj3 densit\*).ti,ab. OR (mammographic adj3 densit\*).ti,ab.) AND (Mammography/ OR mammograph\*.ti,ab. OR mammogram\*.ti,ab. OR mastrography.ti,ab. OR "digital breast tomosynthesis".ti,ab. OR "x-ray breast tomosynthesis".ti,ab.) NOT (comment.pt. OR editorial.pt. OR letter.pt.)

##### **CINAHL Plus**

=978 results on 9/9/2020; (Limited to English and these publication types: Clinical Trial, Corrected Article, Journal Article, Meta Analysis, Meta Synthesis, Practice Guidelines, Proceedings, Protocol, Randomized Controlled Trial, Research, Review, Systematic Review)

**Updated search** (dated limited to 2020-present): 135 results on 10/14/2021

((MH "Breast Tissue Density") OR AB(breast N3 densit\*) OR TI(breast N3 densit\*) OR AB(mammary N3 densit\*) TI(mammary N3 densit\*) OR AB(mammographic N3 densit\*) OR TI(mammographic N3 densit\*)) AND ((MH "Mammography") OR AB(mammograph\*) OR TI(mammograph\*) OR AB(mammogram\*) OR TI(mammogram\*) OR AB(mastrography) OR TI(mastrography) OR AB("digital breast tomosynthesis") OR TI("digital breast tomosynthesis") OR AB("x-ray breast tomosynthesis") OR TI("x-ray breast tomosynthesis"))

## Scopus

=3,162 results on 9/9/2020 (Limited to English; editorials, notes, letters, and book chapters excluded from results)

**Updated search** (date limited to 2020-present): 423 results on 10/14/2021

TITLE-ABS ( ( breast W/3 densit\* ) OR ( mammary W/3 densit\* ) OR ( mammographic W/3 densit\* ) ) AND TITLE-ABS ( mammograph\* OR mammogram\* OR mastrography OR "digital breast tomosynthesis" OR "x-ray breast tomosynthesis" ) AND ( EXCLUDE ( DOCTYPE , "no" ) OR EXCLUDE ( DOCTYPE , "ch" ) OR EXCLUDE ( DOCTYPE , "le" ) OR EXCLUDE ( DOCTYPE , "ed" ) ) AND ( LIMIT-TO ( LANGUAGE , "English" ) )

## Cochrane Library

=358 results on 9/9/2020 (1 Cochrane Protocol and 357 results from CENTRAL Trials)

**Updated Search** (date limited 2020-present in CENTRAL Trials) = 32 results on 10/14/2021

ID Search

#1 MeSH descriptor: [Breast Density] explode all trees

#2 ((breast NEAR/3 densit\*) OR (mammary NEAR/3 densit\*) OR (mammary NEAR/3 densit\*) OR (mammographic NEAR/3 densit\*)):ti,ab,kw

#3 #1 OR #2

#4 MeSH descriptor: [Mammography] explode all trees

#5 (mammograph\* OR mammogram\* OR mastrography OR "digital breast tomosynthesis" OR "xray breast tomosynthesis"):ti,ab,kw

#6 #4 OR #5

#7 #3 AND #6

## ClinicalTrials.gov

= 11 results (searched the "Other terms" field) on 9/9/2020

**Updated Search** = 12 results on 10/14/2021 (1 new result, added to the Excel library)  
("breast density" OR "mammary density") AND (mammograph\* OR mammogram\* OR mastrography OR "digital breast tomosynthesis" OR "x-ray breast tomosynthesis")
