# Supplementary material for: Repeated measures of mammographic density and texture to evaluate prediction and risk of breast cancer: a systematic review of the methods used in the literature
Source: PubMed Central journal article supplement (PMC10533570; doi:10.1007/s10552-023-01739-2), 2023-06-20
Supplement: 10552_2023_1739_MOESM2_ESM.pdf [file 10552_2023_1739_MOESM2_ESM.pdf]

Article title: Repeated measures of mammographic density and texture to evaluate prediction of breast cancer risk: a systematic review of the methods used in the literature

Journal name: Cancer Causes & Control

Author names: Akila Anandarajah, Yongzhen Chen, Carolyn Stoll, Angela Hardi, Shu Jiang, Graham A. Colditz

Affiliation and e-mail address of the corresponding author: Division of Public Health Sciences, Department of Surgery, Washington University School of Medicine, 660 S Euclid Ave MSC 8100-0094-2200, Saint Louis, MO 63110; colditzg@wustl.edu

Supplementary Table 1 Sample size and time from mammogram to diagnosis of cancer in studies included (sorted by year published)

| Author          | Year | # cases | # controls | Time from mammogram to diagnosis of cancer                                                                                                                                                          |
|-----------------|------|---------|------------|-----------------------------------------------------------------------------------------------------------------------------------------------------------------------------------------------------|
| Salminen(37)    | 1998 | 68      | 4013       | At least 6 months                                                                                                                                                                                   |
| van Gils(41)    | 1999 | 108     | 400        | Prior to diagnosis. Diagnosed with cancer between 1985 and 1994. Screening from 1975-1994.                                                                                                          |
| Maskarinec(35)  | 2006 | 607     | 667        | The earliest mammogram was taken $6.3 \pm 4.0$ years before diagnosis                                                                                                                               |
| Kerlikowske(30) | 2007 | 2639    | 299316     | Within 12 months of the last examination                                                                                                                                                            |
| Vachon(40)      | 2007 | 372     | 713        | The time interval between the initial mammogram and the diagnosis of cancer or exam date in controls was $7.0 \pm 1.5$ years on average (range, 2.1-10.4).                                          |
| Lokate(34)      | 2013 | 533     | 1367       | Mammograms taken until diagnosis                                                                                                                                                                    |
| Work(42)        | 2014 | 85      | 85         | Cancer diagnosis occurred a median of 1.5 years after the second mammogram (range, 6 months to 9.4 years)                                                                                           |
| Kerlikowske(29) | 2015 | 13715   | 708939     | Diagnosed during follow-up period (which has mean = 6.6 years, range = 1 day to 10 years). Women diagnosed the 3 months following their second examination were excluded.                           |
| Busana(25)      | 2016 | 313     | 452        | Only images taken at least 1 year prior to diagnosis were included                                                                                                                                  |
| Humphrey(27)    | 2016 | 170     | 510        | Cases had an initial negative mammographic screen and another three years later when cancer was diagnosed.                                                                                          |
| Khoo(31)        | 2016 | 250     | 250        | Mammogram before diagnosis used                                                                                                                                                                     |
| Tan(39)         | 2016 | 159     | 176        | The average elapsed time between the "current" and each of "prior" #1, #2 and #3 studies was $1.16 \pm 0.41$ , $2.30 \pm 0.55$ and $3.44 \pm 0.72$ years, respectively.                             |
| Byrne(26)       | 2017 | 174     | 733        | NR                                                                                                                                                                                                  |
| Brandt(24)      | 2019 | 1160    | 2360       | Within 2 months and 1–5 years before diagnosis                                                                                                                                                      |
| Román(36)       | 2019 | 1592    | 115796     | Diagnosed within two years of the last screening examination in the study period                                                                                                                    |
| Azam(23)        | 2020 | 563     | 43247      | Diagnosed during follow-up period (which has average = 5.4 years)                                                                                                                                   |
| Kim(32)         | 2020 | 803     | 73446      | Diagnosed during follow-up period (which has median = 6.1 years, interquartile range = 4.1-8.8 years, maximum = 13 years)                                                                           |
| Sartor(38)      | 2020 | 51      | 102        | The last mammogram was defined as the last screening round before diagnosis (76 %) or the diagnostic mammographic examination (24%)                                                                 |
| Kang(28)        | 2021 | 45      | 3552       | Diagnosed during follow-up period (which has median = 4.8 years, interquartile range 2.8–7.5 years)                                                                                                 |
| Kim(33)         | 2021 | 22781   | 3278498    | Excluded women diagnosed with breast cancer within 90 days after the second screening. Screening in both 2009 to 2010 and 2011 to 2012 with breast cancer incidence identified up to December 2017. |

Abbreviations: NR = not reported

Supplementary Table 2 Time between mammograms, baseline variables, and texture features in studies included (sorted by increasing average number of mammograms used)

| Author      | Year | Avg <sup>a</sup> number of mmgs used | Avg <sup>a</sup> time between mmgs                                                | Avg <sup>a</sup> time from first to last mmg                                      | Baseline variables                                                                                                                                                                                                                                                                                                                             | Non-density texture considered Y/N (if yes, what)                                        |
|-------------|------|--------------------------------------|-----------------------------------------------------------------------------------|-----------------------------------------------------------------------------------|------------------------------------------------------------------------------------------------------------------------------------------------------------------------------------------------------------------------------------------------------------------------------------------------------------------------------------------------|------------------------------------------------------------------------------------------|
| Kerlikowske | 2007 | 2                                    | Median = 3.2 years                                                                | Median = 3.2 years                                                                | adjusted for mammography registry, time between the two screening examinations, age                                                                                                                                                                                                                                                            | N                                                                                        |
| Work        | 2014 | 2                                    | Median = 4.0 years for cases (range 1-15) and 4.0 years for controls (range 1-14) | Median = 4.0 years for cases (range 1-15) and 4.0 years for controls (range 1-14) | Adjusted for age at first mammogram (Model 1), as well as parity, family history, menopausal status (Model 2) and additionally adjusted for baseline density (Model 3). Change in percent density is not adjusted.                                                                                                                             | N                                                                                        |
| Kerlikowske | 2015 | 2                                    | 1.8 years                                                                         | 1.8 years                                                                         | none                                                                                                                                                                                                                                                                                                                                           | N                                                                                        |
| Humphrey    | 2016 | 2                                    | 3 years                                                                           | 3 years                                                                           | adjusted for relevant density measure at initial screen                                                                                                                                                                                                                                                                                        | N                                                                                        |
| Khoo        | 2016 | 2                                    | at most 3 years                                                                   | at most 3 years                                                                   | none                                                                                                                                                                                                                                                                                                                                           | Y. Includes first 13 Haralick texture features computed for three scales and brightness. |
| Byrne       | 2017 | 2                                    | 1 year                                                                            | 1 year                                                                            | adjusted for baseline BMI, age, clinical center, age at first birth, and parity                                                                                                                                                                                                                                                                | N                                                                                        |
| Brandt      | 2019 | 2                                    | Median = 3.0 years for cases, 3.1 years for controls                              | Median = 3.0 years for cases, 3.1 years for controls                              | age, BMI, change in BMI, time between mammograms                                                                                                                                                                                                                                                                                               | N                                                                                        |
| Román       | 2019 | 2                                    | Average = 5.8 years, median = 4.1 years                                           | Average = 5.8 years, median = 4.1 years                                           | adjusted for time between screening mammography examinations (offset), screening center, mammography type, and year of screen                                                                                                                                                                                                                  | N                                                                                        |
| Kim         | 2021 | 2                                    | screened twice during 2009 to 2010 and 2011 to 2012                               | screened twice during 2009 to 2010 and 2011 to 2012                               | adjusted for age, age at menarche, menopausal status, age at menopause, number of children, breastfeeding duration, hormone replacement therapy among menopausal women, oral contraceptive use, family history in first-degree relatives, body-mass index, smoking status, drinking status during the past year and physical activity per week | N                                                                                        |
| Kim         | 2020 | NR                                   | women participated in an annual or biannual health examinations                   | NR                                                                                | age adjusted only and adjusted for age, center, year of screening examination, smoking status, regular exercise, alcohol intake, educational level, BMI, history of diabetes, history of hypertension, history of cardiovascular                                                                                                               | N                                                                                        |

| Author     | Year | Avg <sup>a</sup> number of mmgs used | Avg <sup>a</sup> time between mmgs                                                                                                  | Avg <sup>a</sup> time from first to last mmg                                                                             | Baseline variables                                                                                                                                                                                                                                                                    | Non-density texture considered Y/N (if yes, what)                                                                             |
|------------|------|--------------------------------------|-------------------------------------------------------------------------------------------------------------------------------------|--------------------------------------------------------------------------------------------------------------------------|---------------------------------------------------------------------------------------------------------------------------------------------------------------------------------------------------------------------------------------------------------------------------------------|-------------------------------------------------------------------------------------------------------------------------------|
|            |      |                                      |                                                                                                                                     |                                                                                                                          | disease, family history of BC, female hormone medication use, and menopausal status                                                                                                                                                                                                   |                                                                                                                               |
| Kang       | 2021 | NR                                   | Measured both pre and postmenopause. Excluded participants who had more than a 5-year interval between exams pre and postmenopause. | NR                                                                                                                       | Model 1 was adjusted for age and BMI. Model 2 was further adjusted for smoking status, alcohol consumption, family history of BC, diabetes, hypertension and dyslipidemia. Logistic regression model was adjusted for age at menopause and BMI.                                       | N                                                                                                                             |
| Salminen   | 1998 | 2-5                                  | 2 years                                                                                                                             | NR                                                                                                                       | adjusted for age only and age, BMI, number of pregnancies, size of the breast                                                                                                                                                                                                         | N                                                                                                                             |
| Azam       | 2020 | 2-5                                  | 18-24 months                                                                                                                        | Mean = 5.4 years                                                                                                         | adjusted for age, BMI, and MD area at baseline                                                                                                                                                                                                                                        | N                                                                                                                             |
| Maskarinec | 2006 | 2.8                                  | If available, mammograms for every second or third year were scanned                                                                | 4.2 years for controls and 5.1 for cases                                                                                 | Predictor variables in the final model included age, the square of age, case status, ethnicity, BMI, soy intake early in life, soy intake as an adult, parity, age at menarche, age at first live birth, menopausal status, and HT use in the year of the mammogram.                  | N                                                                                                                             |
| Sartor     | 2020 | 3                                    | Median = 4.5 years for cases and 4.7 years for controls                                                                             | NR                                                                                                                       | none                                                                                                                                                                                                                                                                                  | N                                                                                                                             |
| Tan        | 2016 | 4                                    | Elapsed time between the "current" and each of "prior" #1, #2 and #3 studies was 1.16, 2.30 and 3.44 years, respectively            | Elapsed time between the "current" and each of "prior" #1, #2 and #3 studies was 1.16, 2.30 and 3.44 years, respectively | none                                                                                                                                                                                                                                                                                  | Y. Selected relevant features from 158 initial mammographic density, structural similarity, and texture based image features. |
| van Gils   | 1999 | 5                                    | 2 years                                                                                                                             | NR                                                                                                                       | adjusted for family history of BC, age at first birth/nulliparity, age at menarche, menopausal status and Quetelet index at the beginning of the study period                                                                                                                         | N                                                                                                                             |
| Lokate     | 2013 | 5                                    | NR                                                                                                                                  | Mean = 9.5 years                                                                                                         | Linear mixed effects model was adjusted for BMI, height, parity, age at first delivery, number of children, menopausal status, contraceptive pill use, and hormone therapy use. All logistic regression analyses were adjusted for the same potential confounders as the linear mixed | N                                                                                                                             |

| Author | Year | Avg <sup>a</sup> number of mmgs used | Avg <sup>a</sup> time between mmgs | Avg <sup>a</sup> time from first to last mmg    | Baseline variables                                                                                                      | Non-density texture considered Y/N (if yes, what) |
|--------|------|--------------------------------------|------------------------------------|-------------------------------------------------|-------------------------------------------------------------------------------------------------------------------------|---------------------------------------------------|
|        |      |                                      |                                    |                                                 | effects model, plus the follow-up time between the first and last mammograms.                                           |                                                   |
| Vachon | 2007 | For cases, 5.0. For controls, 5.2.   | NR                                 | Mean = for cases, 7.1 years. For controls, 7.0. | adjusted for BMI, menopausal status, BC in a first degree relative, age at first birth, number of births, and HT status | N                                                 |
| Busana | 2016 | For cases, 5. For controls, 7.       | 1 year                             | NR                                              | adjusted for age, BMI, parity, and family history of BC                                                                 | N                                                 |

Abbreviations: avg = average, BC = breast cancer, BMI = body mass index, HT = hormone therapy, MD = mammographic density, mmg = mammogram, N = no, NR = not reported, Y = yes

<sup>a</sup> Average specified as mean or median when mentioned by study

Supplementary Table 3 Prediction horizon and change features of studies reporting AUC (sorted by average number of mammograms used)

| Author                   | Year | Avg <sup>a</sup> number of mmgs used    | Prediction horizon (5/10 yr) | Change in density or texture features for cases                                                                                                                                                                                                                                                                                                                                                                                                                                                                       | Change in density or texture features for controls                                                                                                                                                                                                                                                                                                                                                                                                                                                                          |
|--------------------------|------|-----------------------------------------|------------------------------|-----------------------------------------------------------------------------------------------------------------------------------------------------------------------------------------------------------------------------------------------------------------------------------------------------------------------------------------------------------------------------------------------------------------------------------------------------------------------------------------------------------------------|-----------------------------------------------------------------------------------------------------------------------------------------------------------------------------------------------------------------------------------------------------------------------------------------------------------------------------------------------------------------------------------------------------------------------------------------------------------------------------------------------------------------------------|
| Kerlikowske <sup>b</sup> | 2015 | 2                                       | 5 and 10 year                | A total of 63.5% of combined cases and controls had the same BI-RADS density on two sequential examinations while 17.9% had an increase in breast density category and 18.6% had a decrease. The most common combinations of changing density categories were heterogeneously dense on the earlier examination and scattered fibroglandular on the most recent examination (10.0%) and scattered fibroglandular densities on the earlier examination and heterogeneously dense on the most recent examination (9.9%). | A total of 63.5% of combined cases and controls women had the same BI-RADS density on two sequential examinations while 17.9% had an increase in breast density category and 18.6% had a decrease. The most common combinations of changing density categories were heterogeneously dense on the earlier examination and scattered fibroglandular on the most recent examination (10.0%) and scattered fibroglandular densities on the earlier examination and heterogeneously dense on the most recent examination (9.9%). |
| Khoo                     | 2016 | 2                                       | NR                           | NR                                                                                                                                                                                                                                                                                                                                                                                                                                                                                                                    | NR                                                                                                                                                                                                                                                                                                                                                                                                                                                                                                                          |
| Brandt                   | 2019 | 2                                       | NR                           | The cancerous (ipsilateral) breast VPD decreased 0.26% and the contralateral breast VPD decreased 0.39% for a difference of 0.13%. For DV, the ipsilateral breast decreased 2.10 cm <sup>3</sup> and the contralateral breast decreased 2.74 cm <sup>3</sup> for a difference of 0.63 cm <sup>3</sup> .                                                                                                                                                                                                               | The ipsilateral breast VPD decreased 0.29% and the contralateral breast VPD decreased 0.28% for a difference of -0.02%. For DV, the ipsilateral breast decreased 1.82 cm <sup>3</sup> and the contralateral breast decreased 1.89 cm <sup>3</sup> for a difference of 0.05 cm <sup>3</sup> .                                                                                                                                                                                                                                |
| Tan                      | 2016 | 4                                       | NR                           | NR                                                                                                                                                                                                                                                                                                                                                                                                                                                                                                                    | NR                                                                                                                                                                                                                                                                                                                                                                                                                                                                                                                          |
| Vachon                   | 2007 | Mean for cases, 5.0. For controls, 5.2. | NR                           | Difference in percent density from earliest to latest mammogram: for the ipsilateral side, mean (SE) = -1.3% (7.5). For the contralateral side, mean (SE) = -1.5% (7.4). The difference in PD in the contralateral breast between cases and controls was 5.5% at 9 years before the cancer, 5.3%, at 5 years, and only 4.0% at 3 years. The corresponding values for the ipsilateral side were 4.9%, 4.9%, and 4.1%, respectively.                                                                                    | Difference in percent density from earliest to latest mammogram: for the ipsilateral side, mean (SE) = -1.2% (6.3). For the contralateral side, mean (SE) = -1.1% (6.5). The difference in PD in the contralateral breast between cases and controls was 5.5% at 9 years before the cancer, 5.3%, at 5 years, and only 4.0% at 3 years. The corresponding values for the ipsilateral side were 4.9%, 4.9%, and 4.1%, respectively.                                                                                          |

Abbreviations: AUC = area under curve, avg = average, DV = dense volume, mmg = mammogram, NR = not reported, SE = standard error, VPD = volumetric percent density

<sup>a</sup> Average specified as mean or median when mentioned by study

<sup>b</sup> Kerlikowske 2015 uses change in density to predict future risk of breast cancer, whereas other studies report association between change in mammographic characteristics and risk of breast cancer

Supplementary Table 4 Analytical models used for repeated measures of mammographic features that do not report AUC (sorted by average number of mammograms used)

| Author      | Year | Avg <sup>a</sup> number of mmgs used | Prediction horizon (5/10 yr) | Risk other than AUC                                                                                                                                                                                                                                                                                                                                                                    | Change in density or texture features for cases                                                                                                                                                                                                                                                                                                    | Change in density or texture features for controls                                                                                                                                                                                                                                                                                                          |
|-------------|------|--------------------------------------|------------------------------|----------------------------------------------------------------------------------------------------------------------------------------------------------------------------------------------------------------------------------------------------------------------------------------------------------------------------------------------------------------------------------------|----------------------------------------------------------------------------------------------------------------------------------------------------------------------------------------------------------------------------------------------------------------------------------------------------------------------------------------------------|-------------------------------------------------------------------------------------------------------------------------------------------------------------------------------------------------------------------------------------------------------------------------------------------------------------------------------------------------------------|
| Kerlikowske | 2007 | 2                                    | NR                           | OR of BC if BI-RADS breast density category increased from 1 to 2 (= 1.9, 95% CI = 1.4 to 2.6) and 1 to 3 (= 3.4, 95% CI = 2.0 to 5.7)                                                                                                                                                                                                                                                 | A total of 19.6% of all women had an increase in breast density category and 18.5% had a decrease. The majority of women had a BI-RADS breast density category of 2 or 3 on the first and last examination: 29.4% of women with BC had BI-RADS scores of 2 on the first and last screens, and 24.3% women with BC had scores of 3 on both screens. | A total of 19.6% of all women had an increase in breast density category and 18.5% had a decrease. The majority of women had a BI-RADS breast density category of 2 or 3 on the first and last examination: 30.0% of women without BC had BI-RADS scores of 2 on the first and last screens, and 22.9% of women without BC had scores of 3 on both screens. |
| Work        | 2014 | 2                                    | NR                           | A >5% decrease in percent density was inversely associated with BC (OR=0.56, 95% CI = 0.15 to 2.17 for fully adjusted model), while a >5% increase in percent density was positively associated with BC (OR=2.55, 95% CI = 0.63 to 10.26); however, these associations were not statistically significant.                                                                             | Percent density = +0.29% per year. Mean change = -2.67% (range of -34–16).                                                                                                                                                                                                                                                                         | Percent density = -1.62% per year. Mean change = -5.35% (range of -48–49).                                                                                                                                                                                                                                                                                  |
| Humphrey    | 2016 | 2                                    | NR                           | NR                                                                                                                                                                                                                                                                                                                                                                                     | PD change for affected breast = -0.4%, PD change for unaffected breast = -0.3%                                                                                                                                                                                                                                                                     | PD change = -0.4% and -0.5%                                                                                                                                                                                                                                                                                                                                 |
| Byrne       | 2017 | 2                                    | NR                           | Controlling for baseline mammographic density, a 1% change in mammographic density increased BC risk 4%, but not statistically significantly, in women assigned placebos (OR = 1.04, 95% CI = 0.98 to 1.11). The increase in BC risk was not statistically significant (OR = 1.20, 95% CI = 0.40 to 2.97) comparing the highest to the lowest quintile of mammographic density change. | For combined cases and controls assigned placebo, mean mammographic density change = -0.05% with median of 0.0%                                                                                                                                                                                                                                    | For combined cases and controls assigned placebo, mean mammographic density change = -0.05% with median of 0.0%                                                                                                                                                                                                                                             |
| Román       | 2019 | 2                                    | NR                           | Women whose density category                                                                                                                                                                                                                                                                                                                                                           | Most frequently, women                                                                                                                                                                                                                                                                                                                             | Most frequently, women remained at                                                                                                                                                                                                                                                                                                                          |

| Author   | Year | Avg <sup>a</sup> number of mmgs used | Prediction horizon (5/10 yr) | Risk other than AUC                                                                                                                                                                                                                                                                                                                                                                                                                                                    | Change in density or texture features for cases                                                                                                                                                                                                                                                      | Change in density or texture features for controls                                                                                                                                                                                                                                                   |
|----------|------|--------------------------------------|------------------------------|------------------------------------------------------------------------------------------------------------------------------------------------------------------------------------------------------------------------------------------------------------------------------------------------------------------------------------------------------------------------------------------------------------------------------------------------------------------------|------------------------------------------------------------------------------------------------------------------------------------------------------------------------------------------------------------------------------------------------------------------------------------------------------|------------------------------------------------------------------------------------------------------------------------------------------------------------------------------------------------------------------------------------------------------------------------------------------------------|
|          |      |                                      |                              | increased from B to C or B to D had a RR of 1.55 (95% CI = 1.24 to 1.94) and 2.32 (95% CI = 1.48 to 3.63), respectively. The RR for women whose density increased from C to D was 1.51 (95% CI = 1.03 to 2.22).                                                                                                                                                                                                                                                        | remained at density category B at earliest and latest examination (33.1%). The proportion of women that remained at BI-RADS density C or D was greater for women with BC. 34.0% experienced a decrease and 12.5% experienced an increase in breast density category.                                 | density category B at earliest and latest examination (40.8%). The proportion of women that remained at BI-RADS density A or B was significantly greater for women without BC. 25.8% had a decrease, and 11.8% had an increase in breast density category.                                           |
| Kim      | 2021 | 2                                    | 5 year                       | For women with BI-RADS Category 4 during both screenings, the 5-year risk was 1.24% (95% CI = 1.19 to 1.28).                                                                                                                                                                                                                                                                                                                                                           | 23.0% of combined cases and controls had a higher density category, and 22.2% had a lower density category in the second screening compared to the first screening.                                                                                                                                  | 23.0% of combined cases and controls had a higher density category, and 22.2% had a lower density category in the second screening compared to the first screening.                                                                                                                                  |
| Kim      | 2020 | NR                                   | NR                           | Multivariable-adjusted HRs for incident BC comparing the regressed, developed, and persistent breast density groups with the "none" group were 1.81 (95% CI = 0.98 to 3.36), 1.47 (95% CI = 0.76 to 2.84), and 3.01 (95% CI = 1.94 to 4.69), respectively.                                                                                                                                                                                                             | NR                                                                                                                                                                                                                                                                                                   | NR                                                                                                                                                                                                                                                                                                   |
| Kang     | 2021 | NR                                   | NR                           | In comparison to consistently nondense group, HR for consistently dense group = 2.31 (95% CI = 1.12 to 4.75) for fully adjusted model, HR for density decrease = 0.83 (95% CI = 0.19 to 3.60), and HR for density increase = 1.04 (95% CI = 0.24 to 4.42). In addition, compared to the participants with decreased breast density after menopause, participants with increased breast density had a four-fold greater risk of BC (HR = 4.27, 95% CI = 0.45 to 40.29). | For combined cases and controls, 199 (5.5%) experienced a density decrease and 185 (5.1%) a density increase pre to postmenopause. The other 89.4% of participants exhibited no changes in density; 641 (17.8%) had consistently dense breast tissue and 2,572 (71.5%) never exhibited dense breast. | For combined cases and controls, 199 (5.5%) experienced a density decrease and 185 (5.1%) a density increase pre to postmenopause. The other 89.4% of participants exhibited no changes in density; 641 (17.8%) had consistently dense breast tissue and 2,572 (71.5%) never exhibited dense breast. |
| Salminen | 1998 | 2-5                                  | NR                           | The age-adjusted RR of BC among women with unfavourable                                                                                                                                                                                                                                                                                                                                                                                                                | For combined cases and controls, at the first screening                                                                                                                                                                                                                                              | For combined cases and controls, at the first screening round, the prevalence of                                                                                                                                                                                                                     |

| Author | Year | Avg <sup>a</sup><br>number<br>of mmgs<br>used | Prediction<br>horizon<br>(5/10 yr) | Risk other than AUC                                                                                                                                                                                                                                                                                                                                                                                                                                                                                                                                                                                                                                                                | Change in density or texture<br>features for cases                                                                                                                                                                                                                                                                                                                                                                  | Change in density or texture features<br>for controls                                                                                                                                                                                                                                                                                                                                      |
|--------|------|-----------------------------------------------|------------------------------------|------------------------------------------------------------------------------------------------------------------------------------------------------------------------------------------------------------------------------------------------------------------------------------------------------------------------------------------------------------------------------------------------------------------------------------------------------------------------------------------------------------------------------------------------------------------------------------------------------------------------------------------------------------------------------------|---------------------------------------------------------------------------------------------------------------------------------------------------------------------------------------------------------------------------------------------------------------------------------------------------------------------------------------------------------------------------------------------------------------------|--------------------------------------------------------------------------------------------------------------------------------------------------------------------------------------------------------------------------------------------------------------------------------------------------------------------------------------------------------------------------------------------|
|        |      |                                               |                                    | <p>parenchymal patterns of the breast at the first round were only marginally increased (RR varied from 1.5 to 1.3 among women with P2 to DY patterns). After taking into account the mammographic parenchymal pattern sequentially at the rounds preceding the diagnosis, the RRS varied from 2.6 to 4.7 and were statistically significant. There was only a small and not statistically significant increase in the risk of BC among those women whose breast patterns changed either from favorable to unfavorable (RR = 1.3, 95% CI = 0.2 to 9.8) or from unfavorable to favorable (RR = 1.2, 95% CI = 0.5 to 2.8) compared with women whose patterns remained favorable.</p> | <p>round, the prevalence of normal mammographic parenchymal pattern (N1) was 13% and the prevalence of DY pattern was about 4%. There was a drift in the mammographic parenchymal patterns from the unfavourable P2,DY types to the favourable N1,P1 types between the first and the last screening rounds. At the last screening round the prevalence of N1 patterns was 46% and that of DY patterns under 1%.</p> | <p>normal mammographic parenchymal pattern (N1) was 13% and the prevalence of DY pattern was about 4%. There was a drift in the mammographic parenchymal patterns from the unfavourable P2,DY types to the favourable N1,P1 types between the first and the last screening rounds. At the last screening round the prevalence of N1 patterns was 46% and that of DY patterns under 1%.</p> |
| Azam   | 2020 | 2-5                                           | NR                                 | <p>Compared with women with a decreased MD over time, no statistically significant difference in BC risk was seen for women with either stable MD or increasing MD (HR = 1.01, 95% CI = 0.82 to 1.23 and 0.98, 95% CI = 0.80 to 1.22, respectively). Among premenopausal women, there was a weak but statistically nonsignificant association between annual increase in MD greater than 10% and risk of BC (HR = 1.12, 95% CI = 0.77 to 1.64) compared with premenopausal women with an annual decrease in MD greater than 10%. Women ages 40-49 with an increase in annual MD greater than 10% had a</p>                                                                         | NR                                                                                                                                                                                                                                                                                                                                                                                                                  | NR                                                                                                                                                                                                                                                                                                                                                                                         |



| Author     | Year | Avg <sup>a</sup> number of mmgs used | Prediction horizon (5/10 yr) | Risk other than AUC                                                                                                                                                                                                                                                                                                                                                                                                                                                                                                                                                            | Change in density or texture features for cases                                                                                                                                                                                                                                                                                                                                                                                                                           | Change in density or texture features for controls                                                                                                                                                                                                                                                                                                                                                                                                                        |
|------------|------|--------------------------------------|------------------------------|--------------------------------------------------------------------------------------------------------------------------------------------------------------------------------------------------------------------------------------------------------------------------------------------------------------------------------------------------------------------------------------------------------------------------------------------------------------------------------------------------------------------------------------------------------------------------------|---------------------------------------------------------------------------------------------------------------------------------------------------------------------------------------------------------------------------------------------------------------------------------------------------------------------------------------------------------------------------------------------------------------------------------------------------------------------------|---------------------------------------------------------------------------------------------------------------------------------------------------------------------------------------------------------------------------------------------------------------------------------------------------------------------------------------------------------------------------------------------------------------------------------------------------------------------------|
|            |      |                                      |                              | statistically nonsignificant 30% higher risk compared to perimenopausal women with greater than 10% annual MD reduction.                                                                                                                                                                                                                                                                                                                                                                                                                                                       |                                                                                                                                                                                                                                                                                                                                                                                                                                                                           |                                                                                                                                                                                                                                                                                                                                                                                                                                                                           |
| Maskarinec | 2006 | mean = 2.8                           | NR                           | NR                                                                                                                                                                                                                                                                                                                                                                                                                                                                                                                                                                             | For combined cases and controls, unadjusted percent densities differed by ~20% between age 40 and 60. We estimated the age-related decline as 5.63% per 10 years. The nonlinear effect of 1.64% per 10 years in the full model described the faster decline of densities over time earlier in life than later. The mean size of the total breast area was 25% larger at age 75 to 80 than at age 40 to 45, whereas the size of the dense areas decreased by 34% with age. | For combined cases and controls, unadjusted percent densities differed by ~20% between age 40 and 60. We estimated the age-related decline as 5.63% per 10 years. The nonlinear effect of 1.64% per 10 years in the full model described the faster decline of densities over time earlier in life than later. The mean size of the total breast area was 25% larger at age 75 to 80 than at age 40 to 45, whereas the size of the dense areas decreased by 34% with age. |
| Sartor     | 2020 | 3                                    | NR                           | NR                                                                                                                                                                                                                                                                                                                                                                                                                                                                                                                                                                             | Density change = -0.3%                                                                                                                                                                                                                                                                                                                                                                                                                                                    | Density change = +1.7%                                                                                                                                                                                                                                                                                                                                                                                                                                                    |
| van Gils   | 1999 | 5                                    | 10 year                      | In women with 5–25% density initially, we observed a trend of decreasing risk with diminishing density: when women with <5% density throughout the whole period formed the reference category, the OR for those who decreased from 5–25% to <5% density was 1.9 (95% CI = 0.6 to 6.1) in contrast to the OR of 5.7 (95% CI = 2.2 to 15.2) for those with persisting 5–25% density. The risk in women whose density pattern increased from 5–25% density to >25% density was slightly higher (OR = 6.9; 95% CI = 2.1 to 22.9) than that in women with persisting 5–25% density. | Majority of cases stayed at 5-25% density                                                                                                                                                                                                                                                                                                                                                                                                                                 | Majority of controls stayed at 5-25% density                                                                                                                                                                                                                                                                                                                                                                                                                              |
| Lokate     | 2013 | 5                                    | NR                           | For each percentage point                                                                                                                                                                                                                                                                                                                                                                                                                                                                                                                                                      | The mean decline in percent                                                                                                                                                                                                                                                                                                                                                                                                                                               | The mean decline in percent density                                                                                                                                                                                                                                                                                                                                                                                                                                       |

| Author | Year | Avg <sup>a</sup> number of mmgs used    | Prediction horizon (5/10 yr) | Risk other than AUC                                                                                                                                                                                                                                                                                                                                                              | Change in density or texture features for cases                                                                                                                                                                                                                                                                                                                                                                                                                                                                                                                                                                                                   | Change in density or texture features for controls                                                                                                                                                                                                                                                                                                                                                                                                                                                                                                                                                                                       |
|--------|------|-----------------------------------------|------------------------------|----------------------------------------------------------------------------------------------------------------------------------------------------------------------------------------------------------------------------------------------------------------------------------------------------------------------------------------------------------------------------------|---------------------------------------------------------------------------------------------------------------------------------------------------------------------------------------------------------------------------------------------------------------------------------------------------------------------------------------------------------------------------------------------------------------------------------------------------------------------------------------------------------------------------------------------------------------------------------------------------------------------------------------------------|------------------------------------------------------------------------------------------------------------------------------------------------------------------------------------------------------------------------------------------------------------------------------------------------------------------------------------------------------------------------------------------------------------------------------------------------------------------------------------------------------------------------------------------------------------------------------------------------------------------------------------------|
|        |      |                                         |                              | decrease in mammographic density, OR = 1.01 (95% CI = 0.99 to 1.02). Those who increased in density by one or more categories seemed to have a slightly increased risk (statistically significant only for those increasing from the first to the second quartile of dense area, OR = 2.8, 95% CI = 1.3 to 6.1).                                                                 | density between the first and last available mammograms was 10.8% for both BC cases and controls. The change in absolute dense area was not different for BC cases and controls (mean = -15.2 cm <sup>2</sup> ). The mean change in absolute nondense area was +12.3 cm <sup>2</sup> . 47% of all women showed a decline; 49% stayed in the same category; and 4% showed an increase in percent density over an average period of 10 years. Generally, women in whom breast density decreased with one or more categories had a slightly lower risk of BC than did those who stayed in the same category, although not statistically significant. | between the first and last available mammograms was 10.8% for both BC cases and controls. The change in absolute dense area was not different for BC cases and controls (mean = -15.2 cm <sup>2</sup> ). The mean change in absolute nondense area was +7.3 cm <sup>2</sup> . 47% of all women showed a decline; 49% stayed in the same category; and 4% showed an increase in percent density over an average period of 10 years. Generally, women in whom breast density decreased with one or more categories had a slightly lower risk of BC than did those who stayed in the same category, although not statistically significant. |
| Vachon | 2007 | Mean for cases, 5.0. For controls, 5.2. | NR                           | For contralateral PD, the ORs range from 1.0043 (for change in PD of -10 or quartile 1) to 0.9972 (for change in PD of +6.5 or quartile 4) and the confidence intervals exclude all values smaller than 0.99 and >1.02. These results were similar for the ipsilateral side [0.9997 (for change in PD of -10 or quartile 1) to 1.0002 (for change in PD of +6.5 or quartile 4)]. | Difference in percent density from earliest to latest mammogram: for the ipsilateral side, mean (SE) = -1.3% (7.5). For the contralateral side, mean (SE) = -1.5% (7.4). The difference in PD in the contralateral breast between cases and controls was 5.5% at 9 years before the cancer, 5.3%, at 5 years, and only 4.0% at 3 years. The corresponding values for the ipsilateral side were 4.9%, 4.9%, and 4.1%, respectively.                                                                                                                                                                                                                | Difference in percent density from earliest to latest mammogram: for the ipsilateral side, mean (SE) = -1.2% (6.3). For the contralateral side, mean (SE) = -1.1% (6.5). The difference in PD in the contralateral breast between cases and controls was 5.5% at 9 years before the cancer, 5.3%, at 5 years, and only 4.0% at 3 years. The corresponding values for the ipsilateral side were 4.9%, 4.9%, and 4.1%, respectively.                                                                                                                                                                                                       |
| Busana | 2016 | For cases, 5. For controls, 7.          | NR                           | Women with a high PD at baseline, which remained high over time, had the highest odds of developing BC relative to a woman with mean random                                                                                                                                                                                                                                      | NR                                                                                                                                                                                                                                                                                                                                                                                                                                                                                                                                                                                                                                                | Cumulus = -1.17% a year, Image-J = -1.07% a year. The linear component of the yearly rate of change in PD was more than twice as fast after the menopausal transition than prior to it for Cumulus (-                                                                                                                                                                                                                                                                                                                                                                                                                                    |

| Author | Year | Avg <sup>a</sup><br>number<br>of mmgs<br>used | Prediction<br>horizon<br>(5/10 yr) | Risk other than AUC                                                                                                                                                                                                                                                                                                                                                                                                                                            | Change in density or texture<br>features for cases | Change in density or texture features<br>for controls                                                                                                                                     |
|--------|------|-----------------------------------------------|------------------------------------|----------------------------------------------------------------------------------------------------------------------------------------------------------------------------------------------------------------------------------------------------------------------------------------------------------------------------------------------------------------------------------------------------------------------------------------------------------------|----------------------------------------------------|-------------------------------------------------------------------------------------------------------------------------------------------------------------------------------------------|
|        |      |                                               |                                    | <p>intercept and mean slope (OR: 8.10, 95% CI = 3.96 to 16.6 for Cumulus (left MLO) and 3.42, 95% CI = 2.00 to 5.48 for the ImageJ-based method (left–right MLO mean). In contrast, women with the lowest PD at baseline, despite a slight increase in their PD over time, had the lowest odds of developing BC (OR: 0.07, 95% CI = 0.03 to 0.16 for Cumulus (left MLO) and 0.23, 95% CI = 0.12 to 0.43 for the ImageJ-based method (left–right MLO mean).</p> |                                                    | <p>1.10 % vs. -0.50 %, respectively). Similarly, the yearly rate coefficient in the ImageJ-based model was nearly twice as fast after the menopause (-1.16% vs. 0.67%, respectively).</p> |

Abbreviations: AUC = area under curve, avg = average, BC = breast cancer, BI-RADS = Breast Imaging Reporting and Data System, HR = hazard ratio, MD = mammographic density, MLO = mediolateral oblique, mmg = mammogram, NR = not reported, PD = percent density, OR = odds ratio, RR = relative risk, SE = standard error, yr = year

<sup>a</sup> Average specified as mean or median when mentioned by study

Supplementary Table 5 Risk of bias assessments for included studies using QUIPS (sorted by year published)

| Author      | Year | Study Participation   | Study Attrition       | Prognostic Factor Measurement | Outcome Measurement   | Study Confounding     | Statistical Analysis and Reporting |
|-------------|------|-----------------------|-----------------------|-------------------------------|-----------------------|-----------------------|------------------------------------|
| Salminen    | 1998 | Low risk of bias      | Unclear risk of bias  | High risk of bias             | Low risk of bias      | Moderate risk of bias | Moderate risk of bias              |
| van Gils    | 1999 | Low risk of bias      | Unclear risk of bias  | Low risk of bias              | Low risk of bias      | Moderate risk of bias | Moderate risk of bias              |
| Maskarinec  | 2006 | Low risk of bias      | Unclear risk of bias  | Moderate risk of bias         | Low risk of bias      | Low risk of bias      | Moderate risk of bias              |
| Kerlikowske | 2007 | Low risk of bias      | Unclear risk of bias  | Moderate risk of bias         | Low risk of bias      | Moderate risk of bias | Moderate risk of bias              |
| Vachon      | 2007 | Low risk of bias      | Unclear risk of bias  | Low risk of bias              | Low risk of bias      | Moderate risk of bias | Moderate risk of bias              |
| Lokate      | 2013 | Low risk of bias      | Unclear risk of bias  | Low risk of bias              | Low risk of bias      | Moderate risk of bias | Moderate risk of bias              |
| Work        | 2014 | Low risk of bias      | Unclear risk of bias  | Low risk of bias              | Low risk of bias      | Moderate risk of bias | Moderate risk of bias              |
| Kerlikowske | 2015 | Low risk of bias      | Unclear risk of bias  | Moderate risk of bias         | Low risk of bias      | Moderate risk of bias | Low risk of bias                   |
| Busana      | 2016 | Low risk of bias      | Unclear risk of bias  | Moderate risk of bias         | Low risk of bias      | Moderate risk of bias | Moderate risk of bias              |
| Humphrey    | 2016 | Low risk of bias      | Unclear risk of bias  | Low risk of bias              | Low risk of bias      | Low risk of bias      | Moderate risk of bias              |
| Khoo        | 2016 | Moderate risk of bias | Unclear risk of bias  | Low risk of bias              | Low risk of bias      | High risk of bias     | Moderate risk of bias              |
| Tan         | 2016 | Moderate risk of bias | Unclear risk of bias  | Low risk of bias              | Low risk of bias      | High risk of bias     | Moderate risk of bias              |
| Byrne       | 2017 | Low risk of bias      | Moderate risk of bias | Low risk of bias              | Low risk of bias      | Low risk of bias      | Moderate risk of bias              |
| Brandt      | 2019 | Low risk of bias      | Unclear risk of bias  | Low risk of bias              | Low risk of bias      | Moderate risk of bias | Moderate risk of bias              |
| Román       | 2019 | Low risk of bias      | Unclear risk of bias  | Moderate risk of bias         | Low risk of bias      | Moderate risk of bias | Moderate risk of bias              |
| Azam        | 2020 | Low risk of bias      | Unclear risk of bias  | Low risk of bias              | Low risk of bias      | Moderate risk of bias | Moderate risk of bias              |
| Kim         | 2020 | Low risk of bias      | Unclear risk of bias  | Moderate risk of bias         | Moderate risk of bias | Low risk of bias      | Moderate risk of bias              |
| Sartor      | 2020 | Low risk of bias      | Unclear risk of bias  | Low risk of bias              | Low risk of bias      | Moderate risk of bias | Moderate risk of bias              |
| Kang        | 2021 | Low risk of bias      | Unclear risk of bias  | Moderate risk of bias         | Low risk of bias      | Moderate risk of bias | Moderate risk of bias              |
| Kim         | 2021 | Low risk of bias      | Unclear risk of bias  | Moderate risk of bias         | Low risk of bias      | Low risk of bias      | Moderate risk of bias              |

QUIPS = Quality in Prognostic Studies
